# Supplementary material for: Plasmodium vivax Genetic Diversity in Panama: Challenges for Malaria Elimination in Mesoamerica
Source: MDPI journal article supplement (doi:10.3390/pathogens10080989), 2021-08-05

Figure S2. PCR-RFLP profiles of *msh-1* gene amplified from *P. vivax* study samples digested with *Alu* I enzyme.

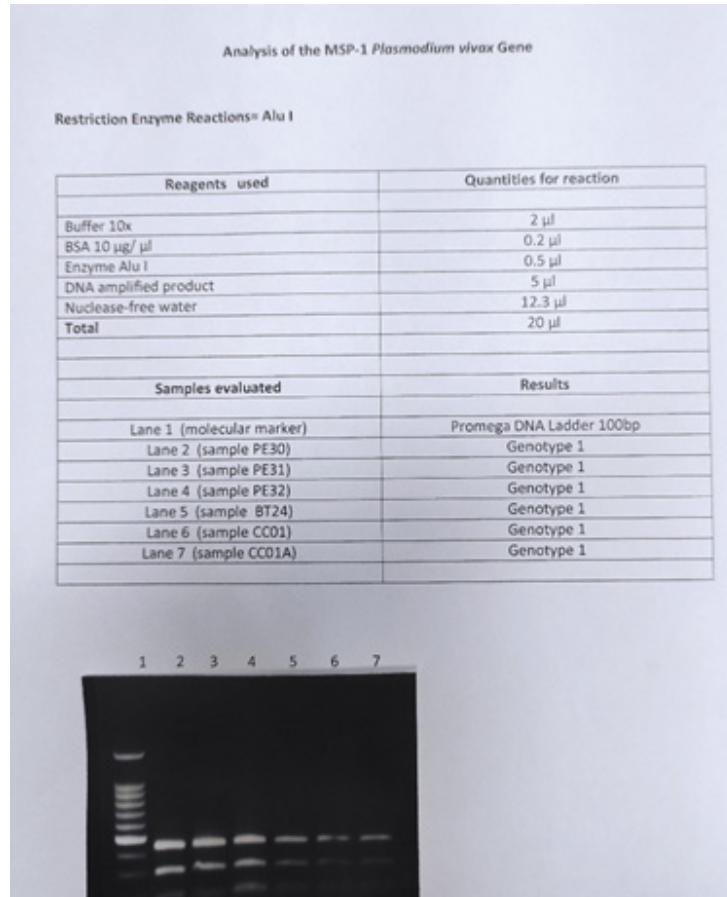

# Analysis of the MSP-1 *Plasmodium vivax* Gene

## Restriction Enzyme Reactions= Alu I

| Reagents used             | Quantities for reaction  |
|---------------------------|--------------------------|
| Buffer 10x                | 2 µl                     |
| BSA 10 µg/ µl             | 0.2 µl                   |
| Enzyme Alu I              | 0.5 µl                   |
| DNA amplified product     | 5 µl                     |
| Nuclease-free water       | 12.3 µl                  |
| <b>Total</b>              | <b>20 µl</b>             |
| Samples evaluated         | Results                  |
| Lane 1 (molecular marker) | Promega DNA Ladder 100bp |
| Lane 2 (sample DA28)      | Genotype I               |
| Lane 3 (sample DA40)      | Genotype 2               |
| Lane 3 (sample DA30)      | Genotype I               |
| Lane 4 (sample DA31)      | Genotype I               |
| Lane 5 (sample DA32)      | Genotype I               |

1 2 3 4 5 6

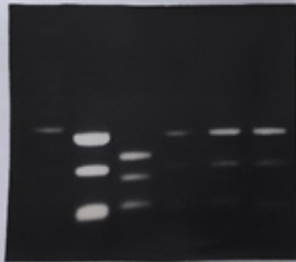

# Analysis of the MSP-1 *Plasmodium vivax* Gene

## Restriction Enzyme Reactions» Alu I

| Reagents used             | Quantities for reaction  |
|---------------------------|--------------------------|
| Buffer 10x                | 2 µl                     |
| BSA 10 µg/ µl             | 0.2 µl                   |
| Enzyme Alu I              | 0.5 µl                   |
| DNA amplified product     | 5 µl                     |
| Nuclease-free water       | 12.3 µl                  |
| <b>Total</b>              | <b>20 µl</b>             |
|                           |                          |
| Samples evaluated         | Results                  |
| Lane 1 (molecular marker) | Promega DNA Ladder 100bp |
| Lane 2 (sample DA44)      | Genotype 2               |
| Lane 3 (sample PO01)      | Genotype 3               |
| Lane 3 (sample PE32)      | Genotype I               |

1 2 3 4

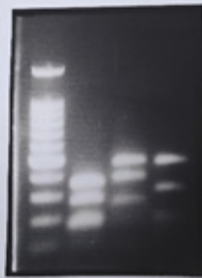

# Analysis of the MSP-1 *Plasmodium vivax* Gene

## Restriction Enzyme Reactions= Alu I

| Reagents used             | Quantities for reaction  |
|---------------------------|--------------------------|
| Buffer 10x                | 2 µl                     |
| BSA 10 µg/ µl             | 0.2 µl                   |
| Enzyme Alu I              | 0.5 µl                   |
| DNA amplified product     | 5 µl                     |
| Nuclease-free water       | 12.3 µl                  |
| <b>Total</b>              | <b>20 µl</b>             |
|                           |                          |
| Samples evaluated         | Results                  |
| Lane 1 (molecular marker) | Promega DNA Ladder 100bp |
| Lane 2 (sample KY145)     | Genotype 1               |
| Lane 3 (sample KY147)     | Genotype 1               |
| Lane 4 (sample KY160)     | Genotype 1               |
| Lane 5 (sample KY161)     | Genotype 1               |
| Lane 6 (sample KY163)     | Genotype 1               |

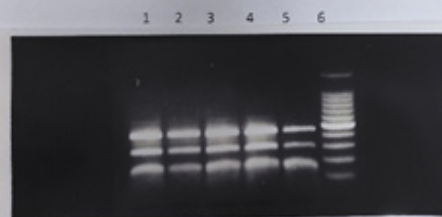

# Analysis of the MSP-1 *Plasmodium vivax* Gene

## Restriction Enzyme Reactions= Alu I

| Reagents used             | Quantities for reaction  |
|---------------------------|--------------------------|
| Buffer 10x                | 2 µl                     |
| BSA 10 µg/ µl             | 0.2 µl                   |
| Enzyme Alu I              | 0.5 µl                   |
| DNA amplified product     | 5 µl                     |
| Nuclease-free water       | 12.3 µl                  |
| <b>Total</b>              | <b>20 µl</b>             |
|                           |                          |
| Samples evaluated         | Results                  |
| Lane 1 (molecular marker) | Promega DNA Ladder 100bp |
| Lane 2 (sample PE60)      | Genotype 2               |
| Lane 3 (sample PE58)      | Genotype 2               |
| Lane 4 (sample PE65)      | Genotype 1               |
| Lane 5 (sample BT16)      | Genotype 1               |
| Lane 6 (sample DA25)      | Genotype 1               |

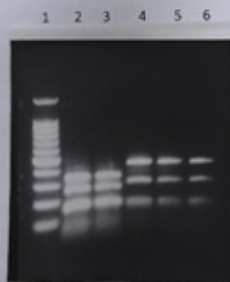

# Analysis of the MSP-1 *Plasmodium vivax* Gene

## Restriction Enzyme Reactions= Alu I

| Reagents used                            | Quantities for reaction  |
|------------------------------------------|--------------------------|
| Buffer 10x                               | 2 µl                     |
| BSA 10 µg/ µl                            | 0.2 µl                   |
| Enzyme Alu I                             | 0.5 µl                   |
| DNA amplified product                    | 5 µl                     |
| Nuclease-free water                      | 12.3 µl                  |
| <b>Total</b>                             | <b>20 µl</b>             |
|                                          |                          |
| Samples evaluated                        | Results                  |
| Lane 1 (molecular marker)                | Promega DNA Ladder 100bp |
| Lane 2 (sample PE34)                     | Genotype 1               |
| Lane 3 (sample PE35)                     | Genotype 1               |
| Lane 4 (sample PE36)                     | Genotype 1               |
| Lane 5 (sample BT08)                     | Genotype 1               |
| Lane 6 (sample BT12)                     | Genotype 1               |
| Lane 7 (sample BT13)                     | Genotype 1               |
| Lane 8 (sample DA06)                     | Genotype 1               |
| Lane 9 (sample DA08)                     | Genotype 1               |
| Lane 10 (sample DA09)                    | Genotype 1               |
| Lane 11 (sample DA14)                    | Genotype 1               |
| Lane 12 undigested secondary PCR product | undigested product       |

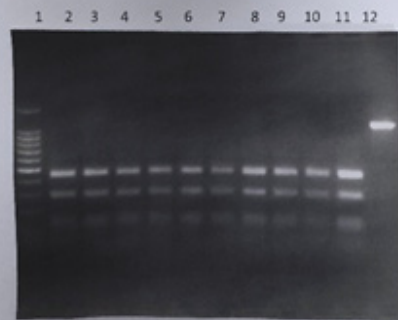

# Analysis of the MSP-1 *Plasmodium vivax* Gene

## Restriction Enzyme Reactions= Alu I

| Reagents used                           | Quantities for reaction  |
|-----------------------------------------|--------------------------|
| Buffer 10x                              | 2 µl                     |
| BSA 10 µg/ µl                           | 0.2 µl                   |
| Enzyme Alu I                            | 0.5 µl                   |
| DNA amplified product                   | 5 µl                     |
| Nuclease-free water                     | 12.3 µl                  |
| <b>Total</b>                            | <b>20 µl</b>             |
|                                         |                          |
| Samples evaluated                       | Results                  |
| Lane 1 (sample KY163)                   | repeat sample            |
| Lane 2 (sample KY153)                   | Genotype 1               |
| Lane 3 (sample KY157)                   | Genotype 1               |
| Lane 4 (sample KY160)                   | repeat sample            |
| Lane 5 undigested secondary PCR product | undigested product       |
| Lane 6 (molecular marker)               | Promega DNA Ladder 100bp |

1 2 3 4 5 6

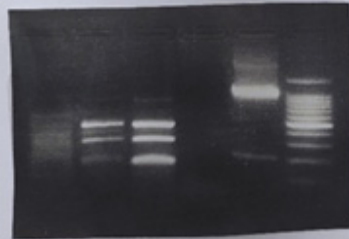

# Analysis of the MSP-1 Plasmodium vivax Gene

## Restriction Enzyme Reactions= Alu I

| Reagents used             | Quantities for reaction  |
|---------------------------|--------------------------|
| Buffer 10x                | 2 µl                     |
| BSA 10 µg/ µl             | 0.2 µl                   |
| Enzyme Alu I              | 0.5 µl                   |
| DNA amplified product     | 5 µl                     |
| Nuclease-free water       | 12.3 µl                  |
| <b>Total</b>              | <b>20 µl</b>             |
| Samples evaluated         | Results                  |
| Lane 1 (molecular marker) | Promega DNA Ladder 100bp |
| Lane 2 (sample DOBA17)    | Genotype 1               |
| Lane 3 (sample PO05)      | Genotype 2               |
| Lane 4 (sample VE24)      | Genotype 1               |
| Lane 5 (sample VE23)      | Genotype 1               |
| Lane 6 (sample VE21)      | Genotype 1               |
| Lane 7 (sample PO01)      | Genotype 3               |
| Lane 8 (sample PO06)      | Genotype 4               |

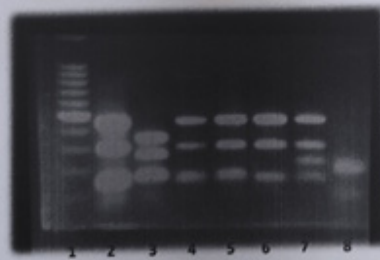



# Analysis of the MSP-1 *Plasmodium vivax* Gene

## Restriction Enzyme Reactions= Alu I

| Reagents used             | Quantities for reaction  |
|---------------------------|--------------------------|
| Buffer 10x                | 2 µl                     |
| BSA 10 µg/ µl             | 0.2 µl                   |
| Enzyme Alu I              | 0.5 µl                   |
| DNA amplified product     | 5 µl                     |
| Nuclease-free water       | 12.3 µl                  |
| <b>Total</b>              | <b>20 µl</b>             |
|                           |                          |
| Samples evaluated         | Results                  |
| Lane 1 (molecular marker) | Promega DNA Ladder 100bp |
| Lane 2 (sample PO56)      | Genotype 2               |
| Lane 3 (sample PO31)      | Genotype 2               |
| Lane 4 (sample PE39)      | Genotype 1               |
| Lane 5 (sample PO22)      | Genotype 1               |
| Lane 6 (sample PO29)      | Genotype 1               |
| Lane 7 (sample PO48)      | Genotype 1               |
| Lane 8 (sample PO01)      | Genotype 3               |
| Lane 9 (sample PO01)      | Genotype 3               |
| Lane 10 (sample PO07)     | Genotype 1               |

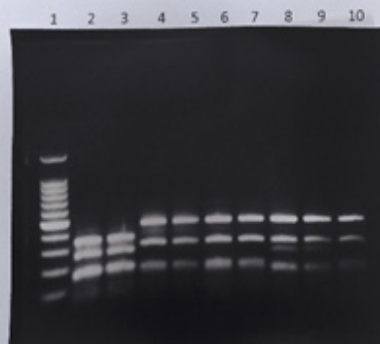

# Analysis of the MSP-1 *Plasmodium vivax* Gene

Restriction Enzyme Reactions= Alu I

| Reagents used             | Quantities for reaction  |
|---------------------------|--------------------------|
| Buffer 10x                | 2 µl                     |
| BSA 10 µg/ µl             | 0.2 µl                   |
| Enzyme Alu I              | 0.5 µl                   |
| DNA amplified product     | 5 µl                     |
| Nuclease-free water       | 12.3 µl                  |
| <b>Total</b>              | <b>20 µl</b>             |
|                           |                          |
| Samples evaluated         | Results                  |
| Lane 1 (molecular marker) | Promega DNA Ladder 100bp |
| Lane 2 (sample DA67)      | Genotype 2               |
| Lane 3 (sample DA68)      | Genotype 2               |
| Lane 4 (sample PO48)      | Genotype 1               |

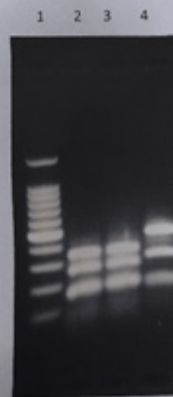

# Analysis of the MSP-1 *Plasmodium vivax* Gene

Restriction Enzyme Reactions= Alu I

| Reagents used             | Quantities for reaction  |
|---------------------------|--------------------------|
| Buffer 10x                | 2 µl                     |
| BSA 10 µg/ µl             | 0.2 µl                   |
| Enzyme Alu I              | 0.5 µl                   |
| DNA amplified product     | 5 µl                     |
| Nuclease-free water       | 12.3 µl                  |
| <b>Total</b>              | <b>20 µl</b>             |
|                           |                          |
| Samples evaluated         | Results                  |
| Lane 1 (sample VE007)     | Genotype 1               |
| Lane 2 (sample VE008)     | Genotype 1               |
| Lane 3 (sample VE009)     | Genotype 1               |
| Lane 4 (sample VE010)     | Genotype 1               |
| Lane 5 (sample VE011)     | Genotype 1               |
| Lane 6 (molecular marker) | Promega DNA Ladder 100bp |

1 2 3 4 5 6

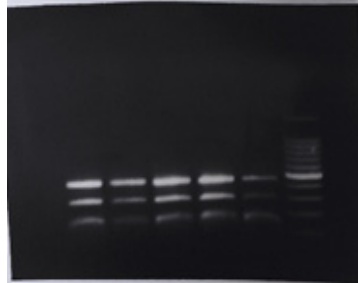

# Analysis of the MSP-1 Plasmodium vivax Gene

Restriction Enzyme Reactions= Alu I

| Reagents used             | Quantities for reaction  |
|---------------------------|--------------------------|
| Buffer 10x                | 2 µl                     |
| BSA 10 µg/ µl             | 0.2 µl                   |
| Enzyme Alu I              | 0.5 µl                   |
| DNA amplified product     | 5 µl                     |
| Nuclease-free water       | 12.3 µl                  |
| <b>Total</b>              | <b>20 µl</b>             |
|                           |                          |
| Samples evaluated         | Results                  |
| Lane 1 (molecular marker) | Promega DNA Ladder 100bp |
| Lane 2 (sample PE30)      | Genotype 1               |
| Lane 3 (sample PE31)      | Genotype 2               |
| Lane 4 (sample PE32)      | Genotype 1               |
| Lane 5 (sample BT24)      | Genotype 1               |
| Lane 6 (sample CC01)      | Genotype 1               |
| Lane 7 (sample PO01 )     | Genotype 3               |
| Lane 8 (sample CC01 A)    | Genotype 1               |
|                           |                          |
|                           |                          |

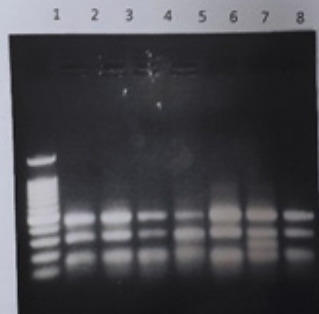

# Analysis of the MSP-1 *Plasmodium vivax* Gene

## Restriction Enzyme Reactions» Alu I

| Reagents used                           | Quantities for reaction  |
|-----------------------------------------|--------------------------|
| Buffer 10x                              | 2 µl                     |
| BSA 10 µg/ µl                           | 0.2 µl                   |
| Enzyme Alu I                            | 0.5 µl                   |
| DNA amplified product                   | 5 µl                     |
| Nuclease-free water                     | 12.3 µl                  |
| <b>Total</b>                            | <b>20 µl</b>             |
|                                         |                          |
| Samples evaluated                       | Results                  |
| Lane 1 (molecular marker)               | Promega DNA Ladder 100bp |
| Lane 2 (sample PO62)                    | Genotype 1               |
| Lane 3 (sample PO59)                    | Genotype 1               |
| Lane 4 (molecular marker)               | Promega DNA Ladder 100bp |
| Lane 5 undigested secondary PCR product | undigested product       |
| Lane 6 undigested secondary PCR product | undigested product       |

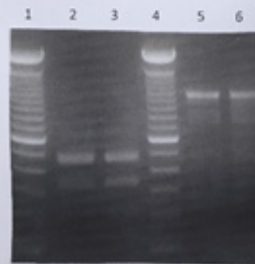

# Analysis of the MSP-1 *Plasmodium vivax* Gene

## Restriction Enzyme Reactions= Alu I

| Reagents used             | Quantities for reaction  |
|---------------------------|--------------------------|
| Buffer 10x                | 2 µl                     |
| BSA 10 µg/ µl             | 0.2 µl                   |
| Enzyme Alu I              | 0.5 µl                   |
| DNA amplified product     | 5 µl                     |
| Nuclease-free water       | 12.3 µl                  |
| <b>Total</b>              | <b>20 µl</b>             |
|                           |                          |
| Samples evaluated         | Results                  |
|                           |                          |
|                           |                          |
|                           |                          |
| Lane 1 (sample KY173)     | Genotype 1               |
| Lane 2 (sample KY168)     | Genotype 1               |
| Lane 3 (sample KY169)     | Genotype 1               |
| Lane 4 (molecular marker) | Promega DNA Ladder 100bp |

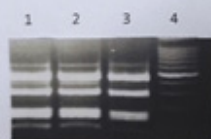

# Analysis of the MSP-1 *Plasmodium vivax* Gene

## Restriction Enzyme Reactions= Alu I

| Reagents used             | Quantities for reaction  |
|---------------------------|--------------------------|
| Buffer 10x                | 2 µl                     |
| BSA 10 µg/ µl             | 0.2 µl                   |
| Enzyme Alu I              | 0.5 µl                   |
| DNA amplified product     | 5 µl                     |
| Nuclease-free water       | 12.3 µl                  |
| <b>Total</b>              | <b>20 µl</b>             |
| Samples evaluated         | Results                  |
| Lane 1 (molecular marker) | Promega DNA Ladder 100bp |
| Lane 2 (sample KY130)     | Genotype 1               |
| Lane 3 (sample KY131)     | Genotype 1               |
| Lane 4 (sample KY136)     | Genotype 1               |
| Lane 5 (sample DA11)      | Genotype 1               |
| Lane 6 (sample DA12)      | Genotype 1               |
| Lane 7 (sample DA13)      | Genotype 1               |
| Lane 8 (sample DOBA07)    | Genotype 1               |
| Lane 9 (sample DOBA09)    | Genotype 1               |
| Lane 10 (sample DOBA15)   | Genotype 1               |
| Lane 11 (sample POS0)     | Genotype 1               |
| Lane 12 (sample POS4)     | Genotype 1               |

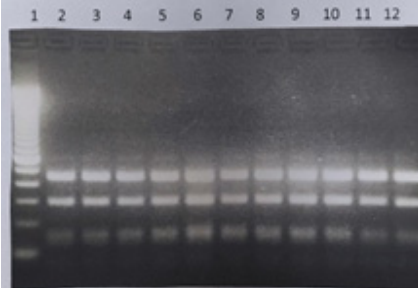

# Analysis of the MSP-1 *Plasmodium vivax* Gene

## Restriction Enzyme Reactions= Alu I

| Reagents used                           | Quantities for reaction  |
|-----------------------------------------|--------------------------|
| Buffer 10x                              | 2 µl                     |
| BSA 10 µg/ µl                           | 0.2 µl                   |
| EnzymeAlu I                             | 0.5 µl                   |
| DNA amplified product                   | 5 µl                     |
| Nuclease-free water                     | 12.3 µl                  |
| <b>Total</b>                            | <b>20 µl</b>             |
|                                         |                          |
| Samples evaluated                       | Results                  |
| Lane 1 (molecular marker)               | Promega DNA Ladder 100bp |
| Lane 2 (sample DA17)                    | Genotype I               |
| Lane 3 (sample DA18)                    | Genotype I               |
| Lane 4 (sample DA19)                    | Genotype I               |
| Lane 5 (sample DA22)                    | Genotype I               |
| Lane 6 (sample DA23)                    | Genotype I               |
| Lane 7 (sample DA24)                    | Genotype I               |
| Lane 8 undigested secondary PCR product | undigested product       |

1 2 3 4 5 6 7 8

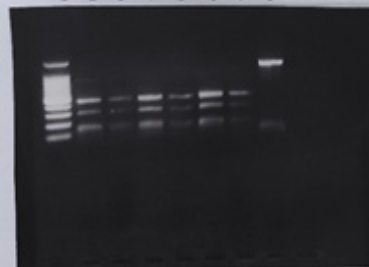



# Analysis of the MSP-1 *Plasmodium vivax* Gene

## Restriction Enzyme Reactions= Alu I

| Reagents used                           | Quantities for reaction  |
|-----------------------------------------|--------------------------|
| Buffer 10x                              | 2 µl                     |
| BSA 10 µg/ µl                           | 0.2 µl                   |
| Enzyme Alu I                            | 0.5 µl                   |
| DNA amplified product                   | 5 µl                     |
| Nuclease-free water                     | 12.3 µl                  |
| <b>Total</b>                            | <b>20 µl</b>             |
|                                         |                          |
| Samples evaluated                       | Results                  |
| Lane 1 (sample DA71)                    | Genotype 1               |
| Lane 2 (sample DA73)                    | Genotype 1               |
| Lane 3 undigested secondary PCR product | undigested product       |
| Lane 4 (molecular marker)               | Promega DNA Ladder 100bp |

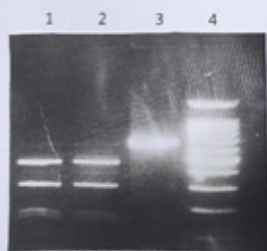

# Analysis of the MSP-1 *Plasmodium vivax* Gene

Restriction Enzyme Reactions= Alu I

| Reagents used             | Quantities for reaction     |
|---------------------------|-----------------------------|
| Buffer 10x                | 2 $\mu$ l                   |
| BSA 10 $\mu$ g/ $\mu$ l   | 0.2 $\mu$ l                 |
| Enzyme Alu I              | 0.5 $\mu$ l                 |
| DNA amplified product     | 5 $\mu$ l                   |
| Nuclease-free water       | 12.3 $\mu$ l                |
| <b>Total</b>              | <b>20 <math>\mu</math>l</b> |
|                           |                             |
| Samples evaluated         | Results                     |
| Lane 1 (sample DA52)      | Genotype 1                  |
| Lane 2 (sample DA53)      | Genotype 1                  |
| Lane 3 (sample DA54)      | Genotype 1                  |
| Lane 4 (sample DA56)      | Genotype 1                  |
| Lane 5 (sample DOBA1)     | Genotype 1                  |
| Lane 6 (molecular marker) | Promega DNA Ladder 100bp    |

1 2 3 4 5 6

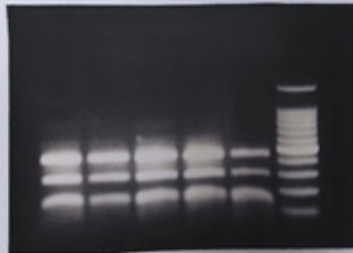

# Analysis of the MSP-1 *Plasmodium vivax* Gene

## Restriction Enzyme Reactions= Alu I

| Reagents used                           | Quantities for reaction  |
|-----------------------------------------|--------------------------|
| Buffer 10x                              | 2 µl                     |
| BSA 10 µg/ µl                           | 0.2 µl                   |
| Enzyme Alu I                            | 0.5 µl                   |
| DNA amplified product                   | 5 µl                     |
| Nuclease-free water                     | 12.3 µl                  |
| Total                                   | 20 µl                    |
|                                         |                          |
| Samples evaluated                       | Results                  |
| Lane 1 (molecular marker)               | Promega DNA Ladder 100bp |
| Lane 2 (sample DA39)                    | Genotype I               |
| Lane 3 (sample DA42)                    | Genotype I               |
| Lane 4 (sample DA43)                    | Genotype I               |
| Lane 5 (sample DA45)                    | Genotype I               |
| Lane 6 (sample DA47)                    | Genotype I               |
| Lane 7 (sample DA48)                    | Genotype I               |
| Lane 8 undigested secondary PCR product | undigested product       |

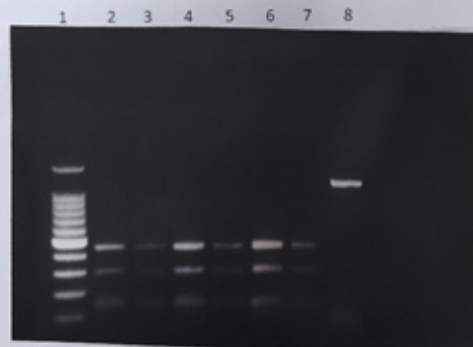

# Analysis of the MSP-1 *Plasmodium vivax* Gene

## Restriction Enzyme Reactions= Alu I

| Reagents used                           | Quantities for reaction  |
|-----------------------------------------|--------------------------|
| Buffer 10x                              | 2 µl                     |
| BSA 10 µg/ µl                           | 0.2 µl                   |
| Enzyme Alu I                            | 0.5 µl                   |
| DNA amplified product                   | 5 µl                     |
| Nuclease-free water                     | 12.3 µl                  |
| <b>Total</b>                            | <b>20 µl</b>             |
|                                         |                          |
| Samples evaluated                       | Results                  |
| Lane 1 (molecular marker)               | Promega DNA Ladder 100bp |
| Lane 2 (sample PM05)                    | Genotype I               |
| Lane 3 (sample PM06)                    | Genotype I               |
| Lane 4 (sample PM10)                    | Genotype I               |
| Lane 5 (sample PM14)                    | Genotype I               |
| Lane 6 (sample PM11)                    | Genotype I               |
| Lane 7 (sample PM12)                    | Genotype I               |
| Lane 8 undigested secondary PCR product | undigested product       |

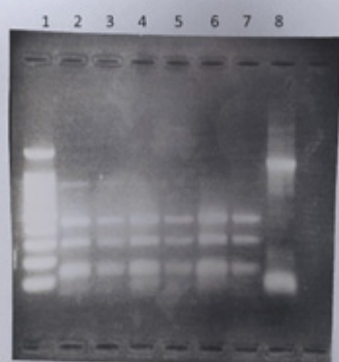

# Analysis of the MSP-1 *Plasmodium vivax* Gene

Restriction Enzyme Reactions= Alu I

| Reagents used             | Quantities for reaction  |
|---------------------------|--------------------------|
| Buffer 10x                | 2 µl                     |
| BSA 10 µg/ µl             | 0.2 µl                   |
| Enzyme Alu I              | 0.5 µl                   |
| DNA amplified product     | 5 µl                     |
| Nuclease-free water       | 12.3 µl                  |
| <b>Total</b>              | <b>20 µl</b>             |
|                           |                          |
| Samples evaluated         | Results                  |
| Lane 1 (sample DA60)      | Genotype I               |
| Lane 2 (sample DA64)      | repeat sample            |
| Lane 3 (sample DA64)      | Genotype I               |
| Lane 4 (sample DA66)      | Genotype I               |
| Lane 5 (sample DA74)      | Genotype I               |
| Lane 6 (molecular marker) | Promega DNA Ladder 100bp |

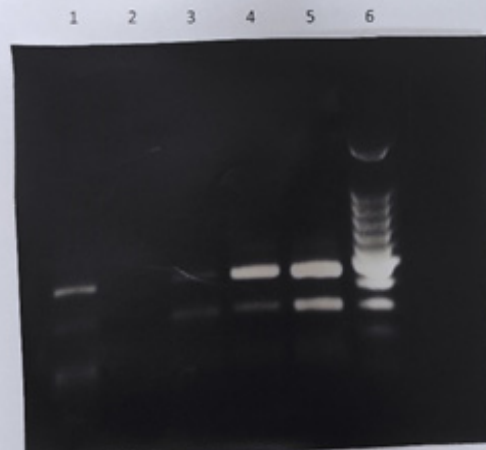

# Restriction Enzyme Reactions= Alu I

| Reagents used             | Quantities for reaction  |
|---------------------------|--------------------------|
| Buffer 10x                | 2 µl                     |
| BSA 10 µg/ µl             | 0.2 µl                   |
| Enzyme Alu I              | 0.5 µl                   |
| DNA amplified product     | 5 µl                     |
| Nuclease-free water       | 12.3 µl                  |
| <b>Total</b>              | <b>20 µl</b>             |
| Samples evaluated         | Results                  |
| Lane 1 (sample KY171)     | Genotype 1               |
| Lane 2 (sample KY172)     | Genotype 1               |
| Lane 3 (sample KY173)     | Genotype 1               |
| Lane 4 (sample KY168)     | Genotype 1               |
| Lane 5 (sample KY169)     | Genotype 1               |
| Lane 6 (molecular marker) | Promega DNA Ladder 100bp |

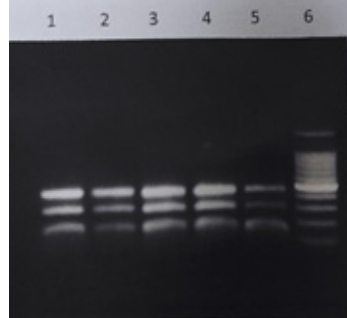

# Analysis of the MSP-1 *Plasmodium vivax* Gene

## Restriction Enzyme Reactions= Alu I

| Reagents used                           | Quantities for reaction  |
|-----------------------------------------|--------------------------|
| Buffer 10x                              | 2 µl                     |
| BSA 10 µg/ µl                           | 0.2 µl                   |
| Enzyme Alu I                            | 0.5 µl                   |
| DNA amplified product                   | 5 µl                     |
| Nuclease-free water                     | 12.3 µl                  |
| <b>Total</b>                            | <b>20 µl</b>             |
|                                         |                          |
| Samples evaluated                       | Results                  |
| Lane 1 (molecular marker)               | Promega DNA Ladder 100bp |
| Lane 2 (sample KY139)                   | Genotype I               |
| Lane 3 (sample KY140)                   | Genotype I               |
| Lane 4 (sample KY141)                   | Genotype I               |
| Lane 5 (sample KY142)                   | Genotype I               |
| Lane 6 (sample KY143)                   | Genotype I               |
| Lane 7 (sample KY144)                   | Genotype I               |
| Lane 8 undigested secondary PCR product | undigested product       |

1 2 3 4 5 6 7 8

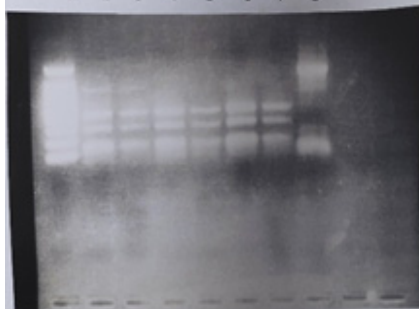

# Analysis of the MSP-1 *Plasmodium vivax* Gene

## Restriction Enzyme Reactions= Alu I

| Reagents used             | Quantities for reaction  |
|---------------------------|--------------------------|
| Buffer 10x                | 2 µl                     |
| BSA 10 µg/ µl             | 0.2 µl                   |
| Enzyme Alu I              | 0.5 µl                   |
| DNA amplified product     | 5 µl                     |
| Nuclease-free water       | 12.3 µl                  |
| <b>Total</b>              | <b>20 µl</b>             |
|                           |                          |
| Samples evaluated         | Results                  |
| Lane 1 (sample VE012)     | Genotype 1               |
| Lane 2 (sample VE018)     | Genotype 1               |
| Lane 3 (sample VE019)     | Genotype 1               |
| Lane 4 (sample VE020)     | Genotype 1               |
| Lane 5 (sample VE021)     | Genotype 1               |
| Lane 6 (molecular marker) | Promega DNA Ladder 100bp |

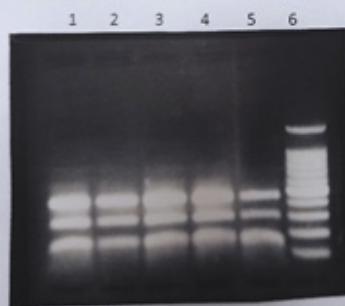



# Analysis of the MSP-1 *Plasmodium vivax* Gene

## Restriction Enzyme Reactions= Alu I

| Reagents used             | Quantities for reaction  |
|---------------------------|--------------------------|
| Buffer 10x                | 2 µl                     |
| BSA 10 µg/ µl             | 0.2 µl                   |
| Enzyme Alu I              | 0.5 µl                   |
| DNA amplified product     | 5 µl                     |
| Nuclease-free water       | 12.3 µl                  |
| <b>Total</b>              | <b>20 µl</b>             |
|                           |                          |
| Samples evaluated         | Results                  |
| Lane 1 (molecular marker) | Promega DNA Ladder 100bp |
| Lane 2 (sample BT05)      | Genotype 1               |
| Lane 3 (sample VE01)      | Genotype 1               |
| Lane 4 (sample VE02)      | Genotype 1               |
| Lane 5 (sample VE03)      | Genotype 1               |
| Lane 6 (sample PM08)      | Genotype 1               |
| Lane 7 (sample PM03)      | Genotype 1               |
| Lane 8 (sample PM04)      | Genotype 1               |
| Lane 9 (sample PE05)      | Genotype 1               |

1 2 3 4 5 6 7 8 9

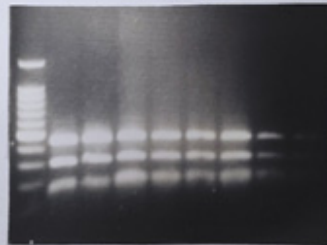

# Analysis of the MSP-1 *Plasmodium vivax* Gene

## Restriction Enzyme Reactions= Alu I

| Reagents used             | Quantities for reaction  |
|---------------------------|--------------------------|
| Buffer 10x                | 2 µl                     |
| BSA 10 µg/ µl             | 0.2 µl                   |
| Enzyme Alu I              | 0.5 µl                   |
| DNA amplified product     | 5 µl                     |
| Nuclease-free water       | 12.3 µl                  |
| Total                     | 20 µl                    |
|                           |                          |
| Samples evaluated         | Results                  |
| Lane 1 (molecular marker) | Promega DNA Ladder 100bp |
| Lane 2 (sample PE50)      | Genotype 2               |
| Lane 2 (sample PM20)      | Genotype 2               |
| Lane 2 (sample PE06)      | Genotype 1               |
| Lane 3 (sample PE07)      | Genotype 1               |
| Lane 4 (sample BT01)      | Genotype 1               |
| Lane 5 (sample BT04)      | Genotype 1               |

1 2 3 4 5 6 7

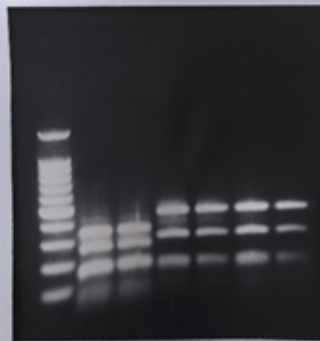

# Analysis of the MSP-1 *Plasmodium vivax* Gene

## Restriction Enzyme Reactions= Alu I

| Reagents used             | Quantities for reaction  |
|---------------------------|--------------------------|
| Buffer 10x                | 2 µl                     |
| BSA 10 µg/ µl             | 0.2 µl                   |
| Enzyme Alu I              | 0.5 µl                   |
| DNA amplified product     | 5 µl                     |
| Nuclease-free water       | 12.3 µl                  |
| <b>Total</b>              | <b>20 µl</b>             |
|                           |                          |
| Samples evaluated         | Results                  |
| Lane 1 (sample PE013)     | Genotype 1               |
| Lane 2 (sample PE014)     | Genotype 1               |
| Lane 3 (sample PE015)     | Genotype 1               |
| Lane 4 (sample PE016)     | Genotype 1               |
| Lane 5 (sample PE017)     | Genotype 1               |
| Lane 6 (molecular marker) | Promega DNA Ladder 100bp |

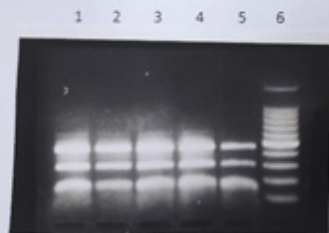

# Analysis of the MSP-1 *Plasmodium vivax* Gene

## Restriction Enzyme Reactions= Alu I

| Reagents used             | Quantities for reaction  |
|---------------------------|--------------------------|
| Buffer 10x                | 2 µl                     |
| BSA 10 µg/ µl             | 0.2 µl                   |
| Enzyme Alu I              | 0.5 µl                   |
| DNA amplified product     | 5 µl                     |
| Nuclease-free water       | 12.3 µl                  |
| <b>Total</b>              | <b>20 µl</b>             |
|                           |                          |
| Samples evaluated         | Results                  |
| Lane 1 (molecular marker) | Promega DNA Ladder 100bp |
| Lane 2 (sample PM19)      | Genotype 1               |
| Lane 3 (sample PM18)      | Genotype 1               |
| Lane 4 (sample PM07)      | Genotype 1               |
| Lane 5 (sample PM09)      | Genotype 1               |
| Lane 6 (sample PM13)      | Genotype 1               |

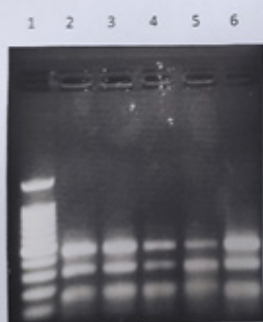

# Analysis of the MSP-1 *Plasmodium vivax* Gene

## Restriction Enzyme Reactions= Alu I

| Reagents used             | Quantities for reaction  |
|---------------------------|--------------------------|
| Buffer 10x                | 2 µl                     |
| BSA 10 µg/ µl             | 0.2 µl                   |
| Enzyme Alu I              | 0.5 µl                   |
| DNA amplified product     | 5 µl                     |
| Nuclease-free water       | 12.3 µl                  |
| <b>Total</b>              | <b>20 µl</b>             |
|                           |                          |
| Samples evaluated         | Results                  |
| Lane 1 (sample PE037)     | Genotype 1               |
| Lane 2 (sample PE38)      | Genotype 1               |
| Lane 3 (sample PE39)      | Genotype 1               |
| Lane 4 (sample PE40)      | Genotype 1               |
| Lane 5 (sample PE41)      | Genotype 1               |
| Lane 6 (molecular marker) | Promega DNA Ladder 100bp |

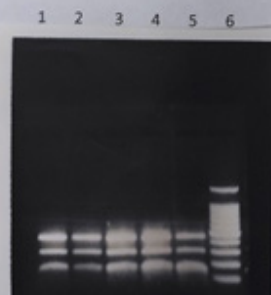

# Analysis of the MSP-1 *Plasmodium vivax* Gene

## Restriction Enzyme Reactions= Alu I

| Reagents used             | Quantities for reaction  |
|---------------------------|--------------------------|
| Buffer 10x                | 2 µl                     |
| BSA 10 µg/ µl             | 0.2 µl                   |
| Enzyme Alu I              | 0.5 µl                   |
| DNA amplified product     | 5 µl                     |
| Nuclease-free water       | 12.3 µl                  |
| <b>Total</b>              | <b>20 µl</b>             |
|                           |                          |
| Samples evaluated         | Results                  |
| Lane 1 (sample PE018)     | Genotype 1               |
| Lane 2 (sample PE025)     | Genotype 1               |
| Lane 3 (sample PE026)     | Genotype 1               |
| Lane 4 (sample PE027)     | Genotype 1               |
| Lane 5 (sample PE028)     | Genotype 1               |
| Lane 6 (molecular marker) | Promega DNA Ladder 100bp |

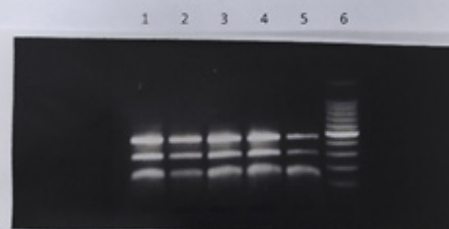

# Analysis of the MSP-1 *Plasmodium vivax* Gene

## Restriction Enzyme Reactions= Alu I

| Reagents used             | Quantities for reaction  |
|---------------------------|--------------------------|
| Buffer 10x                | 2 µl                     |
| BSA 10 µg/ µl             | 0.2 µl                   |
| Enzyme Alu I              | 0.5 µl                   |
| DNA amplified product     | 5 µl                     |
| Nuclease-free water       | 12.3 µl                  |
| <b>Total</b>              | <b>20 µl</b>             |
|                           |                          |
| Samples evaluated         | Results                  |
| Lane 1 (sample VE04)      | Genotype 1               |
| Lane 2 (sample VE05)      | Genotype 1               |
| Lane 3 (sample VE06)      | Genotype 1               |
| Lane 4 (sample VE07)      | Genotype 1               |
| Lane 4 (sample VE07)      | Genotype 1               |
| Lane 6 (molecular marker) | Promega DNA Ladder 100bp |

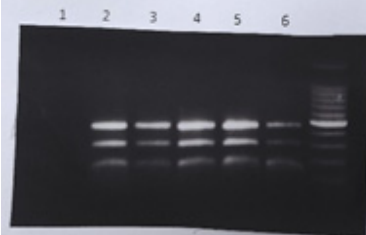

# Analysis of the MSP-1 *Plasmodium vivax* Gene

Restriction Enzyme Reactions= Alu I

| Reagents used             | Quantities for reaction  |
|---------------------------|--------------------------|
| Buffer 10x                | 2 µl                     |
| BSA 10 µg/ µl             | 0.2 µl                   |
| Enzyme Alu I              | 0.5 µl                   |
| DNA amplified product     | 5 µl                     |
| Nuclease-free water       | 12.3 µl                  |
| <b>Total</b>              | <b>20 µl</b>             |
|                           |                          |
| Samples evaluated         | Results                  |
| Lane 1 (molecular marker) | Promega DNA Ladder 100bp |
| Lane 2 (sample BT19)      | Genotype 1               |
| Lane 3 (sample BT20)      | Genotype 1               |
| Lane 4 (sample BT21)      | Genotype 1               |
| Lane 5 (sample BT22)      | Genotype 1               |
| Lane 6 (sample BT23)      | Genotype 1               |

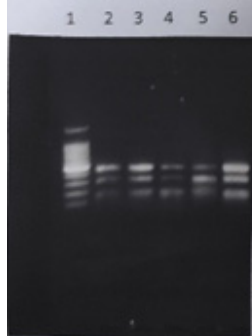



# Analysis of the MSP-1 *Plasmodium vivax* Gene

Restriction Enzyme Reactions= Alu I

| Reagents used             | Quantities for reaction  |
|---------------------------|--------------------------|
| Buffer 10x                | 2 µl                     |
| BSA 10 µg/ µl             | 0.2 µl                   |
| Enzyme Alu I              | 0.5 µl                   |
| DNA amplified product     | 5 µl                     |
| Nuclease-free water       | 12.3 µl                  |
| <b>Total</b>              | <b>20 µl</b>             |
| Samples evaluated         | Results                  |
| Lane 1 (molecular marker) | Promega DNA Ladder 100bp |
| Lane 2 (sample PE008)     | Genotype I               |
| Lane 3 (sample PE009)     | Genotype I               |
| Lane 4 (sample PE010)     | Genotype I               |
| Lane 5 (sample PE011)     | Genotype I               |
| Lane 6 (sample PE012)     | Genotype I               |

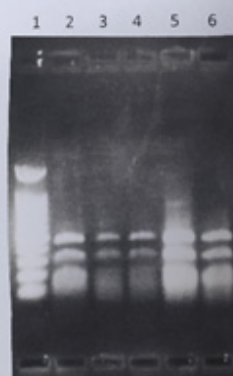

# Analysis of the MSP-1 *Plasmodium vivax* Gene

## Restriction Enzyme Reactions= Alu I

| Reagents used             | Quantities for reaction  |
|---------------------------|--------------------------|
| Buffer 10x                | 2 µl                     |
| BSA 10 µg/ µl             | 0.2 µl                   |
| Enzyme Alu I              | 0.5 µl                   |
| DNA amplified product     | 5 µl                     |
| Nuclease-free water       | 12.3 µl                  |
| <b>Total</b>              | <b>20 µl</b>             |
| Samples evaluated         | Results                  |
| Lane 1 (molecular marker) | Promega DNA Ladder 100bp |
| Lane 2 (sample VE013)     | Genotype I               |
| Lane 3 (sample VE014)     | Genotype I               |
| Lane 4 (sample VE015)     | Genotype I               |
| Lane 5 (sample VE016)     | Genotype I               |
| Lane 6 (sample VE017)     | Genotype I               |

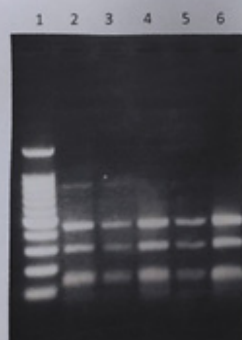

# Analysis of the MSP-1 *Plasmodium vivax* Gene

## Restriction Enzyme Reactions» Alu I

| Reagents used             | Quantities for reaction  |
|---------------------------|--------------------------|
| Buffer 10x                | 2 µl                     |
| BSA 10 µg/ µl             | 0.2 µl                   |
| Enzyme Alu I              | 0.5 µl                   |
| DNA amplified product     | 5 µl                     |
| Nuclease-free water       | 12.3 µl                  |
| <b>Total</b>              | <b>20 µl</b>             |
|                           |                          |
| Samples evaluated         | Results                  |
| Lane 1 (sample DA33)      | Genotype 1               |
| Lane 2 (sample DA34)      | repeat sample            |
| Lane 3 (sample DA35)      | Genotype 1               |
| Lane 4 (sample DA36)      | Genotype 1               |
| Lane 5 (sample DA37)      | Genotype 1               |
| Lane 6 (molecular marker) | Promega DNA Ladder 100bp |

1 2 3 4 5 6

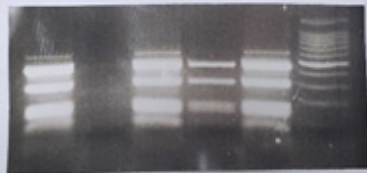

# Analysis of the MSP-1 *Plasmodium vivax* Gene

Restriction Enzyme Reactions= Alu I

| Reagents used             | Quantities for reaction  |
|---------------------------|--------------------------|
| Buffer 10x                | 2 µl                     |
| BSA 10 µg/ µl             | 0.2 µl                   |
| Enzyme Alu I              | 0.5 µl                   |
| DNA amplified product     | 5 µl                     |
| Nuclease-free water       | 12.3 µl                  |
| <b>Total</b>              | <b>20 µl</b>             |
|                           |                          |
| Samples evaluated         | Results                  |
| Lane 1 (molecular marker) | Promega DNA Ladder 100bp |
| Lane 2 (sample PE42)      | Genotype 1               |
| Lane 3 (sample PE44)      | Genotype 1               |
| Lane 4 (sample PE48)      | Genotype 1               |
| Lane 5 (sample PE47)      | Genotype 1               |
| Lane 6 (sample PM02)      | Genotype 1               |
|                           |                          |
|                           |                          |

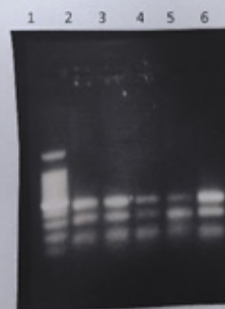

# Analysis of the MSP-1 *Plasmodium vivax* Gene

Restriction Enzyme Reactions= Alu I

| Reagents used             | Quantities for reaction  |
|---------------------------|--------------------------|
| Buffer 10x                | 2 µl                     |
| BSA 10 µg/ µl             | 0.2 µl                   |
| Enzyme Alu I              | 0.5 µl                   |
| DNA amplified product     | 5 µl                     |
| Nuclease-free water       | 12.3 µl                  |
| <b>Total</b>              | <b>20 µl</b>             |
|                           |                          |
| Samples evaluated         | Results                  |
| Lane 1 (molecular marker) | Promega DNA Ladder 100bp |
| Lane 2 (sample PO43)      | Genotype 2               |
| Lane 3 (sample PO45)      | Genotype 2               |
| Lane 4 (sample PE43)      | Genotype 1               |
| Lane 4 (sample PO07)      | Genotype 1               |

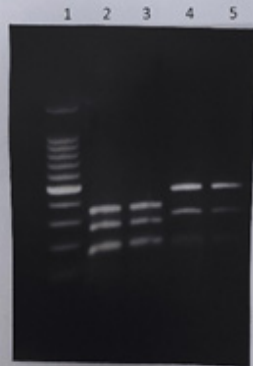

# Analysis of the MSP-1 Plasmodium vivax Gene

Restriction Enzyme Reactions= Alu I

| Reagents used             | Quantities for reaction  |
|---------------------------|--------------------------|
| Buffer 10x                | 2 µl                     |
| BSA 10 µg/ µl             | 0.2 µl                   |
| Enzyme Alu I              | 0.5 µl                   |
| DNA amplified product     | 5 µl                     |
| Nuclease-free water       | 12.3 µl                  |
| <b>Total</b>              | <b>20 µl</b>             |
|                           |                          |
| Samples evaluated         | Results                  |
| Lane 1 (molecular marker) | Promega DNA Ladder 100bp |
| Lane 2 (sample VE25)      | Genotype 1               |
| Lane 3 (sample VE25)      | Genotype 1               |
| Lane 4 (sample PE48)      | Genotype 1               |
| Lane 5 (sample PE49)      | Genotype 1               |
| Lane 6 (sample PE52)      | Genotype 1               |
| Lane 7 (sample PE56)      | Genotype 1               |
| Lane 8 (sample PE53)      | Genotype 1               |
|                           |                          |

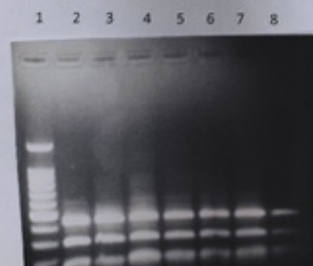

# Analysis of the MSP-1 *Plasmodium vivax* Gene

## Restriction Enzyme Reactions= Alu I

| Reagents used                           | Quantities for reaction     |
|-----------------------------------------|-----------------------------|
| Buffer 10x                              | 2 $\mu$ l                   |
| BSA 10 $\mu$ g/ $\mu$ l                 | 0.2 $\mu$ l                 |
| Enzyme Alu I                            | 0.5 $\mu$ l                 |
| DNA amplified product                   | 5 $\mu$ l                   |
| Nuclease-free water                     | 12.3 $\mu$ l                |
| <b>Total</b>                            | <b>20 <math>\mu</math>l</b> |
| Samples evaluated                       | Results                     |
| Lane 1 (sample DAS1 )                   | Genotype 2                  |
| Lane 2 (sample DAS0)                    | Genotype 1                  |
| Lane 3 undigested secondary PCR product | undigested product          |
| Lane 4 undigested secondary PCR product | undigested product          |
| Lane 5 (molecular marker)               | Promega DNA Ladder 100bp    |

1 2 3 4 5

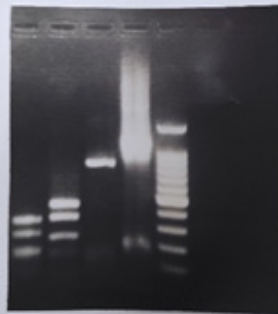

Supplement: s1 [file s1]
