# Supplementary material for: Plasmodium vivax Genetic Diversity in Panama: Challenges for Malaria Elimination in Mesoamerica
Source: MDPI journal article supplement (doi:10.3390/pathogens10080989), 2021-08-05

Figure S3. PCR-RFLP profiles of *msh-3 $\alpha$*  gene amplified from *P. vivax* study samples digested with *Hha* I enzyme.

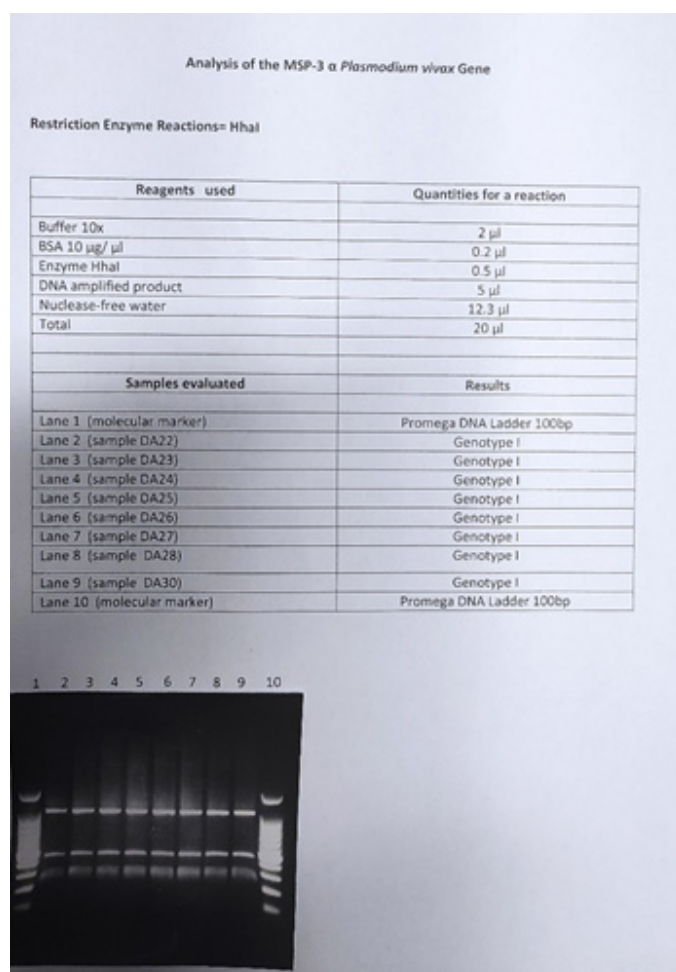

# Analysis of the MSP-3 $\alpha$ *Plasmodium vivax* Gene

## Restriction Enzyme Reactions= HhaI

| Reagents used                           | Quantities for a reaction |
|-----------------------------------------|---------------------------|
| Buffer 10x                              | 2 $\mu$ l                 |
| BSA 10 $\mu$ g/ $\mu$ l                 | 0.2 $\mu$ l               |
| Enzyme HhaI                             | 0.5 $\mu$ l               |
| DNA amplified product                   | 5 $\mu$ l                 |
| Nuclease-free water                     | 12.3 $\mu$ l              |
| Total                                   | 20 $\mu$ l                |
|                                         |                           |
| Samples evaluated                       | Results                   |
| Lane 1 (molecular marker)               | Promega DNA Ladder 100bp  |
| Lane 2 (sample DA65)                    | Genotype 2                |
| Lane 3 (sample DA66)                    | Genotype 2                |
| Lane 4 (sample DA67)                    | Genotype 2                |
| Lane 5 (sample DA68)                    | Genotype 2                |
| Lane 6 (sample DA69)                    | Genotype 2                |
| Lane 7 (sample DA71)                    | Genotype 2                |
| Lane 8 (sample DA73)                    | Genotype I                |
| Lane 9 undigested secondary PCR product | undigested product        |

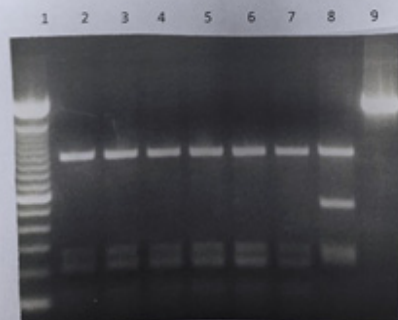

# Analysis of the MSP-3 $\alpha$ *Plasmodium vivax* Gene

Restriction Enzyme Reactions= HhaI

| Reagents used             | Quantities for a reaction   |
|---------------------------|-----------------------------|
| Buffer 10x                | 2 $\mu$ l                   |
| BSA 10 $\mu$ g/ $\mu$ l   | 0.2 $\mu$ l                 |
| Enzyme HhaI               | 0.5 $\mu$ l                 |
| DNA amplified product     | 5 $\mu$ l                   |
| Nuclease-free water       | 12.3 $\mu$ l                |
| <b>Total</b>              | <b>20 <math>\mu</math>l</b> |
| Samples evaluated         | Results                     |
| Lane 1 (molecular marker) | Promega DNA Ladder 100bp    |
| Lane 2 (sample PE51)      | Genotype 2                  |
| Lane 3 (sample PE59)      | repeat sample               |
| Lane 4 (sample DA34)      | Genotype 2                  |
| Lane 5 (sample DA38)      | Genotype 2                  |
| Lane 6 (sample DA43)      | Genotype 2                  |
| Lane 7 (sample DA45)      | Genotype 1                  |
| Lane 8 (sample DA46)      | Genotype 2                  |
| Lane 9 (sample DA48)      | Genotype 2                  |
| Lane 10 (sample DAS3)     | Genotype 2                  |
| Lane 11 (sample PO01)     | Genotype 3                  |
| Lane 12 (sample KY151)    | Genotype 2                  |
| Lane 13 (sample DAS2)     | Genotype 2                  |
| Lane 14 (sample DAS4)     | Genotype 2                  |

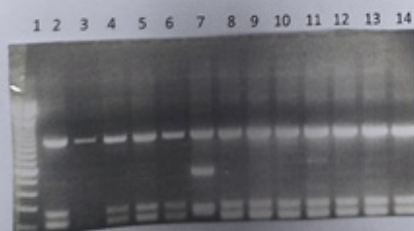

# Analysis of the MSP-3 α *Plasmodium vivax* Gene

## Restriction Enzyme Reactions= HhaI

| Reagents used             | Quantities for a reaction |
|---------------------------|---------------------------|
| Buffer 10x                | 2 µl                      |
| BSA 10 µg/ µl             | 0.2 µl                    |
| Enzyme HhaI               | 0.5 µl                    |
| DNA amplified product     | 5 µl                      |
| Nuclease-free water       | 12.3 µl                   |
| <b>Total</b>              | <b>20 µl</b>              |
|                           |                           |
| Samples evaluated         | Results                   |
| Lane 1 (sample PO01)      | Genotype 3                |
| Lane 2 (sample DA49)      | Genotype 1                |
| Lane 3 (sample DA52)      | Genotype 2                |
| Lane 4 (sample DA53)      | Genotype 2                |
| Lane 5 (sample DA40)      | Genotype 2                |
| Lane 6 (sample DA38)      | Genotype 2                |
| Lane 7 (sample DA43)      | Genotype 2                |
| Lane 8 (molecular marker) | Promega DNA Ladder 100bp  |

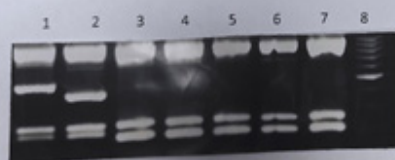

# Analysis of the MSP-3 $\alpha$ *Plasmodium vivax* Gene

## Restriction Enzyme Reactions= HhaI

| Reagents used             | Quantities for a reaction   |
|---------------------------|-----------------------------|
| Buffer 10x                | 2 $\mu$ l                   |
| BSA 10 $\mu$ g/ $\mu$ l   | 0.2 $\mu$ l                 |
| Enzyme HhaI               | 0.5 $\mu$ l                 |
| DNA amplified product     | 5 $\mu$ l                   |
| Nuclease-free water       | 12.3 $\mu$ l                |
| <b>Total</b>              | <b>20 <math>\mu</math>l</b> |
| Samples evaluated         | Results                     |
| Lane 1 (molecular marker) | Promega DNA Ladder 100bp    |
| Lane 2 (sample KY154)     | Genotype 2                  |
| Lane 3 (sample KY155)     | Genotype 2                  |
| Lane 4 (sample KY140)     | Genotype 1                  |
| Lane 5 (sample KY141)     | Genotype 1                  |
| Lane 6 (sample KY143)     | Genotype 1                  |
| Lane 7 (sample KY130)     | Genotype 2                  |
| Lane 8 (sample KY131)     | Genotype 2                  |
| Lane 9 (sample KY134)     | Genotype 2                  |
| Lane 10 (sample KY150)    | Genotype 2                  |

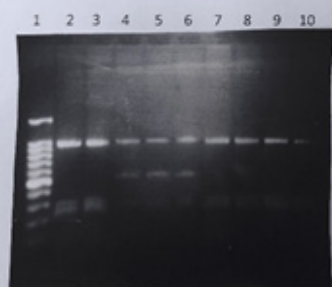

# Analysis of the MSP-3 of *Plasmodium vivax* Gene

## Restriction Enzyme Reactions: HhaI

| Reagents used             | Quantities for a reaction |
|---------------------------|---------------------------|
| Buffer 10x                | 2 µl                      |
| BSA 10 µg/ µl             | 0.2 µl                    |
| Enzyme HhaI               | 0.5 µl                    |
| DNA amplified product     | 5 µl                      |
| Nuclease-free water       | 12.3 µl                   |
| Total                     | 20 µl                     |
|                           |                           |
| Samples evaluated         | Results                   |
| Lane 1 (molecular marker) | Promega DNA Ladder 100bp  |
| Lane 2 (sample PO37)      | Genotype I                |
| Lane 3 (sample PO36)      | Genotype I                |
| Lane 4 (sample PO35)      | Genotype I                |
| Lane 5 (sample PO34)      | Genotype I                |
| Lane 6 (sample PO33)      | Genotype I                |
| Lane 7 (sample PO32)      | Genotype I                |
| Lane 8 (sample PO31)      | Genotype I                |
| Lane 9 (sample PO30)      | Genotype I                |
| Lane 10 (sample PO29)     | Genotype I                |

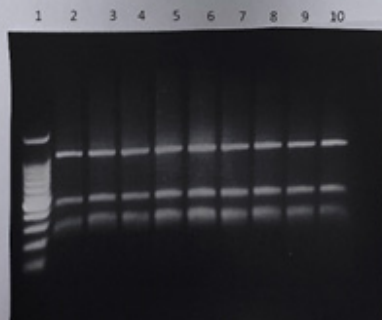

# Analysis of the MSP-3 $\alpha$ *Plasmodium vivax* Gene

## Restriction Enzyme Reactions $\Rightarrow$ HhaI

| Reagents used             | Quantities for a reaction   |
|---------------------------|-----------------------------|
| Buffer 10x                | 2 $\mu$ l                   |
| BSA 10 $\mu$ g/ $\mu$ l   | 0.2 $\mu$ l                 |
| Enzyme HhaI               | 0.5 $\mu$ l                 |
| DNA amplified product     | 5 $\mu$ l                   |
| Nuclease-free water       | 12.3 $\mu$ l                |
| <b>Total</b>              | <b>20 <math>\mu</math>l</b> |
| Samples evaluated         | Results                     |
| Lane 1 (molecular marker) | Promega DNA Ladder 100bp    |
| Lane 2 (sample PE05)      | Genotype 1                  |
| Lane 3 (sample PE06)      | Genotype 1                  |
| Lane 4 (sample PE07)      | Genotype 1                  |
| Lane 5 (sample PE08)      | Genotype 1                  |
| Lane 6 (sample PE09)      | Genotype 1                  |
| Lane 7 (sample PE10)      | Genotype 1                  |
| Lane 8 (sample PE11)      | Genotype 1                  |
| Lane 9 (sample PE12)      | Genotype 1                  |
| Lane 10 (sample PE13)     | Genotype 1                  |

1 2 3 4 5 6 7 8 9 10

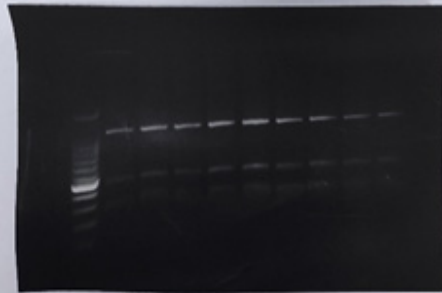

# Analysis of the MSP-3 $\alpha$ *Plasmodium vivax* Gene

## Restriction Enzyme Reactions= HhaI

| Reagents used             | Quantities for a reaction |
|---------------------------|---------------------------|
| Buffer 10x                | 2 $\mu$ l                 |
| BSA 10 $\mu$ g/ $\mu$ l   | 0.2 $\mu$ l               |
| Enzyme HhaI               | 0.5 $\mu$ l               |
| DNA amplified product     | 5 $\mu$ l                 |
| Nuclease-free water       | 12.3 $\mu$ l              |
| Total                     | 20 $\mu$ l                |
|                           |                           |
| Samples evaluated         | Results                   |
| Lane 1 (sample DA45)      | Genotype 2                |
| Lane 2 (sample PE51)      | Genotype 2                |
| Lane 3 (sample PE59)      | Genotype 2                |
| Lane 4 (sample DA34)      | Genotype 2                |
| Lane 5 (sample DA18)      | Genotype 2                |
| Lane 6 (sample DA01)      | Genotype 2                |
| Lane 7 (molecular marker) | Promega DNA Ladder 100bp  |

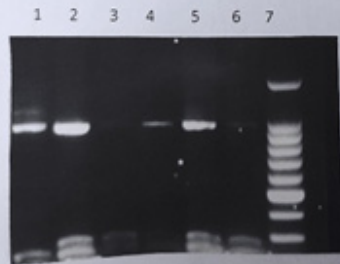



# Analysis of the MSP-1 *Plasmodium vivax* Gene

## Restriction Enzyme Reactions= Alu I

| Reagents used                            | Quantities for reaction  |
|------------------------------------------|--------------------------|
| Buffer 10x                               | 2 µl                     |
| BSA 10 µg/ µl                            | 0.2 µl                   |
| Enzyme Alu I                             | 0.5 µl                   |
| DNA amplified product                    | 5 µl                     |
| Nuclease-free water                      | 12.3 µl                  |
| <b>Total</b>                             | <b>20 µl</b>             |
|                                          |                          |
| Samples evaluated                        | Results                  |
| Lane 1 (molecular marker)                | Promega DNA Ladder 100bp |
| Lane 2 (sample PE34)                     | Genotype 1               |
| Lane 3 (sample PE35)                     | Genotype 1               |
| Lane 4 (sample PE36)                     | Genotype 1               |
| Lane 5 (sample BT08)                     | Genotype 1               |
| Lane 6 (sample BT12)                     | Genotype 1               |
| Lane 7 (sample BT13)                     | Genotype 1               |
| Lane 8 (sample DA06)                     | Genotype 1               |
| Lane 9 (sample DA08)                     | Genotype 1               |
| Lane 10 (sample DA09)                    | Genotype 1               |
| Lane 11 (sample DA14)                    | Genotype 1               |
| Lane 12 undigested secondary PCR product | undigested product       |

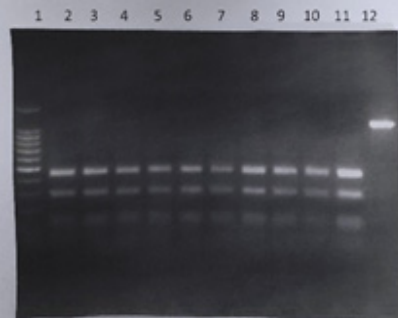

# Analysis of the MSP-3 $\alpha$ *Plasmodium vivax* Gene

## Restriction Enzyme Reactions= HhaI

| Reagents used             | Quantities for a reaction |
|---------------------------|---------------------------|
| Buffer 10x                | 2 $\mu$ l                 |
| BSA 10 $\mu$ g/ $\mu$ l   | 0.2 $\mu$ l               |
| Enzyme HhaI               | 0.5 $\mu$ l               |
| DNA amplified product     | 5 $\mu$ l                 |
| Nuclease-free water       | 12.3 $\mu$ l              |
| Total                     | 20 $\mu$ l                |
|                           |                           |
| Samples evaluated         | Results                   |
| Lane 1 (molecular marker) | Promega DNA Ladder 100bp  |
| Lane 2 (sample PO01)      | Repeat sample             |
| Lane 3 (sample DA34)      | Repeat sample             |
| Lane 4 (sample DA38)      | Genotype 2                |
| Lane 5 (sample DA43)      | Genotype 2                |
| Lane 6 (sample DA46)      | Genotype 2                |
| Lane 7 (sample DA45)      | Genotype 1                |
| Lane 8 (sample KY151)     | Genotype 2                |
| Lane 9 (sample DA52)      | Genotype 2                |
| Lane 10 (sample DA54)     | Genotype 2                |

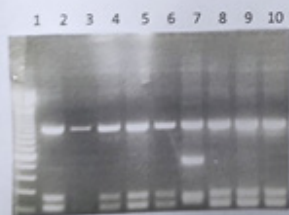

# Analysis of the MSP-1 *Plasmodium vivax* Gene

## Restriction Enzyme Reactions= Alu I

| Reagents used             | Quantities for reaction  |
|---------------------------|--------------------------|
| Buffer 10x                | 2 µl                     |
| BSA 10 µg/ µl             | 0.2 µl                   |
| Enzyme Alu I              | 0.5 µl                   |
| DNA amplified product     | 5 µl                     |
| Nuclease-free water       | 12.3 µl                  |
| <b>Total</b>              | <b>20 µl</b>             |
|                           |                          |
| Samples evaluated         | Results                  |
| Lane 1 (molecular marker) | Promega DNA Ladder 100bp |
| Lane 2 (sample PE60)      | Genotype 2               |
| Lane 3 (sample PES8)      | Genotype 2               |
| Lane 4 (sample PE65)      | Genotype 1               |
| Lane 5 (sample BT16)      | Genotype 1               |
| Lane 6 (sample DA25)      | Genotype 1               |

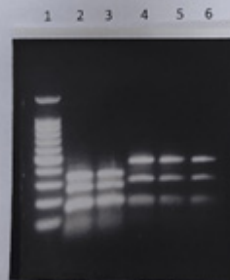

# Analysis of the MSP-1 *Plasmodium vivax* Gene

Restriction Enzyme Reactions= Alu I

| Reagents used             | Quantities for reaction     |
|---------------------------|-----------------------------|
| Buffer 10x                | 2 $\mu$ l                   |
| BSA 10 $\mu$ g/ $\mu$ l   | 0.2 $\mu$ l                 |
| Enzyme Alu I              | 0.5 $\mu$ l                 |
| DNA amplified product     | 5 $\mu$ l                   |
| Nuclease-free water       | 12.3 $\mu$ l                |
| <b>Total</b>              | <b>20 <math>\mu</math>l</b> |
|                           |                             |
| Samples evaluated         | Results                     |
| Lane 1 (sample PE037)     | Genotype 1                  |
| Lane 2 (sample PE38)      | Genotype 1                  |
| Lane 3 (sample PE39)      | Genotype 1                  |
| Lane 4 (sample PE40)      | Genotype 1                  |
| Lane 5 (sample PE41)      | Genotype 1                  |
| Lane 6 (molecular marker) | Promega DNA Ladder 100bp    |

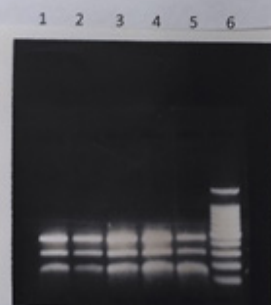

# Analysis of the MSP-3 $\alpha$ *Plasmodium vivax* Gene

## Restriction Enzyme Reactions= HhaI

| Reagents used              | Quantities for a reaction |
|----------------------------|---------------------------|
| Buffer 10x                 | 2 $\mu$ l                 |
| BSA 10 $\mu$ g/ $\mu$ l    | 0.2 $\mu$ l               |
| Enzyme HhaI                | 0.5 $\mu$ l               |
| DNA amplified product      | 5 $\mu$ l                 |
| Nuclease-free water        | 12.3 $\mu$ l              |
| Total                      | 20 $\mu$ l                |
|                            |                           |
| Samples evaluated          | Results                   |
| Lane 1 (sample PO38)       | Genotype I                |
| Lane 2 (sample PO39)       | repeat sample             |
| Lane 3 (sample PO42)       | Genotype I                |
| Lane 4 (sample PO43)       | repeat sample             |
| Lane 5 (sample PO44)       | repeat sample             |
| Lane 6 (sample PO49)       | repeat sample             |
| Lane 7 (sample PO54)       | repeat sample             |
| Lane 8 (sample PO56)       | repeat sample             |
| Lane 9 (sample PO59)       | repeat sample             |
| Lane 10 (molecular marker) | Promega DNA Ladder 100bp  |

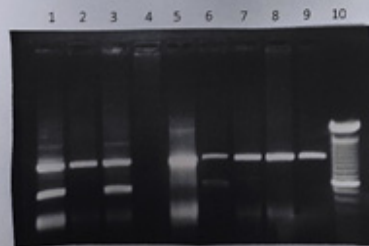

# Analysis of the MSP-3 $\alpha$ *Plasmodium vivax* Gene

Restriction Enzyme Reactions= HhaI

| Reagents used             | Quantities for a reaction |
|---------------------------|---------------------------|
| Buffer 10x                | 2 $\mu$ l                 |
| BSA 10 $\mu$ g/ $\mu$ l   | 0.2 $\mu$ l               |
| Enzyme HhaI               | 0.5 $\mu$ l               |
| DNA amplified product     | 5 $\mu$ l                 |
| Nuclease-free water       | 12.3 $\mu$ l              |
| Total                     | 20 $\mu$ l                |
|                           |                           |
| Samples evaluated         | Results                   |
| Lane 1 (sample PE51)      | Genotype 2                |
| Lane 2 (sample DA46)      | Genotype 2                |
| Lane 3 (sample PE41 )     | Genotype 1                |
| Lane 4 (sample DA20)      | Genotype 3                |
| Lane 5 (molecular marker) | Promega DNA Ladder 100 bp |

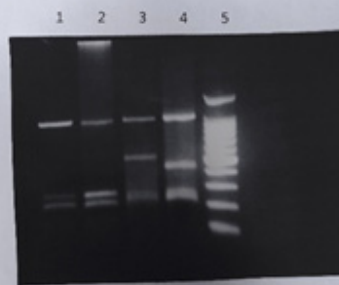

# Analysis of the MSP-3 $\alpha$ *Plasmodium vivax* Gene

Restriction Enzyme Reactions= HhaI

| Reagents used             | Quantities for a reaction |
|---------------------------|---------------------------|
| Buffer 10x                | 2 $\mu$ l                 |
| BSA 10 $\mu$ g/ $\mu$ l   | 0.2 $\mu$ l               |
| Enzyme HhaI               | 0.5 $\mu$ l               |
| DNA amplified product     | 5 $\mu$ l                 |
| Nuclease-free water       | 12.3 $\mu$ l              |
| Total                     | 20 $\mu$ l                |
| Samples evaluated         | Results                   |
| Lane 1 (sample PE59)      | Genotype 2                |
| Lane 2 (sample DA45)      | Genotype 2                |
| Lane 3 (sample PE59 )     | Genotype 2                |
| Lane 4 (sample PE40)      | Genotype 1                |
| Lane 5 (molecular marker) | Promega DNA Ladder 100 bp |

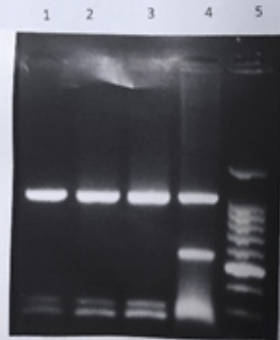

# Analysis of the MSP-3 $\alpha$ *Plasmodium vivax* Gene

## Restriction Enzyme Reactions= HhaI

| Reagents used             | Quantities for a reaction |
|---------------------------|---------------------------|
| Buffer 10x                | 2 $\mu$ l                 |
| BSA 10 $\mu$ g/ $\mu$ l   | 0.2 $\mu$ l               |
| Enzyme HhaI               | 0.5 $\mu$ l               |
| DNA amplified product     | 5 $\mu$ l                 |
| Nuclease-free water       | 12.3 $\mu$ l              |
| Total                     | 20 $\mu$ l                |
| Samples evaluated         | Results                   |
| Lane 1 (molecular marker) | Promega DNA Ladder 100bp  |
| Lane 2 (sample DA22)      | Genotype I                |
| Lane 3 (sample DA23)      | Genotype I                |
| Lane 4 (sample DA24)      | Genotype I                |
| Lane 5 (sample DA25)      | repeat sample             |
| Lane 6 (sample DA26)      | repeat sample             |
| Lane 7 (sample DA27)      | Genotype I                |
| Lane 8 (sample DA28)      | repeat sample             |
| Lane 9 (sample DA30)      | repeat sample             |
| Lane 10 (sample DA30)     | Genotype I                |

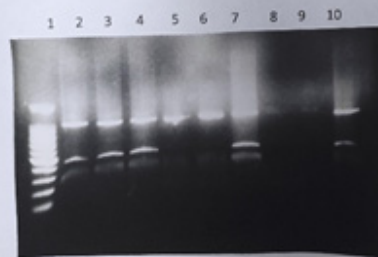



# Analysis of the MSP-3 $\alpha$ *Plasmodium vivax* Gene

Restriction Enzyme Reactions= HhaI

| Reagents used                     | Quantities for a reaction |
|-----------------------------------|---------------------------|
| Buffer 10x                        |                           |
| BSA 10 $\mu\text{g}/\mu\text{l}$  | 2 $\mu\text{l}$           |
| Enzima HhaI                       | 0.2 $\mu\text{l}$         |
| DNA (producto amplificado II PCR) | 0.5 $\mu\text{l}$         |
| Agua libre de nucleasas           | 5 $\mu\text{l}$           |
| Total por reacción                | 12.3 $\mu\text{l}$        |
|                                   | 20 $\mu\text{l}$          |
| Samples evaluated                 | Results                   |
| Lane 1 (sample VE19)              | Genotype I                |
| Lane 2 (sample VE20)              | Genotype I                |
| Lane 3 (sample VE21)              | repeat sample             |
| Lane 4 (sample DA43)              | repeat sample             |
| Lane 5 (sample DA44)              | Genotype 2                |
| Lane 5 (sample DA44)              | Genotype 2                |
| Lane 6 (molecular marker)         | Promega DNA Ladder 1Kb    |

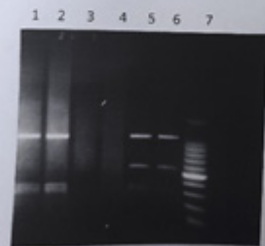

# Analysis of the MSP-3 α *Plasmodium vivax* Gene

## Restriction Enzyme Reactions= HhaI

| Reagents used             | Quantities for a reaction |
|---------------------------|---------------------------|
| Buffer 10x                | 2 µl                      |
| BSA 10 µg/ µl             | 0.2 µl                    |
| Enzyme HhaI               | 0.5 µl                    |
| DNA amplified product     | 5 µl                      |
| Nuclease-free water       | 12.3 µl                   |
| Total                     | 20 µl                     |
|                           |                           |
| Samples evaluated         | Results                   |
| Lane 1 (sample VE12)      | Genotype I                |
| Lane 2 (sample VE13)      | Genotype I                |
| Lane 3 (sample VE14)      | Genotype I                |
| Lane 4 (sample VE15)      | Genotype I                |
| Lane 5 (sample VE19)      | repeat sample             |
| Lane 5 (molecular marker) | Promega DNA Ladder 100bp  |

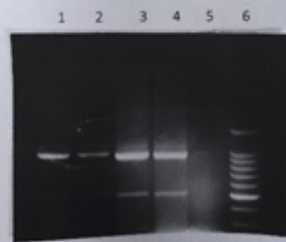

# Analysis of the MSP-3 $\alpha$ *Plasmodium vivax* Gene

## Restriction Enzyme Reactions= HhaI

| Reagents used                    | Quantities for a reaction |
|----------------------------------|---------------------------|
| Buffer 10x                       |                           |
| BSA 10 $\mu\text{g}/\mu\text{l}$ | 2 $\mu\text{l}$           |
| Enzyme HhaI                      | 0.2 $\mu\text{l}$         |
| DNA amplified product            | 0.5 $\mu\text{l}$         |
| Nuclease-free water              | 5 $\mu\text{l}$           |
| Total                            | 12.3 $\mu\text{l}$        |
|                                  | 20 $\mu\text{l}$          |
| Samples evaluated                | Results                   |
| Lane 1 (molecular marker)        | Promega DNA Ladder 100bp  |
| Lane 2 (sample DOBA01)           | Genotype I                |
| Lane 3 (sample DOBA02)           | Genotype I                |
| Lane 4 (sample DOBA03)           | repeat sample             |
| Lane 5 (sample DOBA04)           | repeat sample             |
| Lane 6 (sample DOBA05)           | Genotype I                |
| Lane 7 (sample DOBA07)           | Genotype I                |

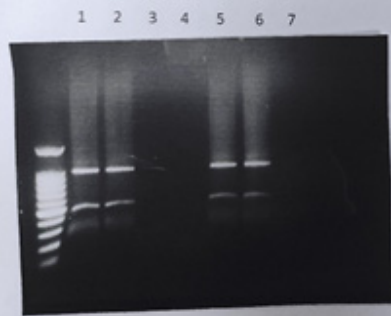

# Analysis of the MSP-3 $\alpha$ Plasmodium vivax Gene

## Restriction Enzyme Reactions= HhaI

| Reagents used             | Quantities for a reaction |
|---------------------------|---------------------------|
| Buffer 10x                | 2 $\mu$ l                 |
| BSA 10 $\mu$ g/ $\mu$ l   | 0.2 $\mu$ l               |
| Enzyme HhaI               | 0.5 $\mu$ l               |
| DNA amplified product     | 5 $\mu$ l                 |
| Nuclease-free water       | 12.3 $\mu$ l              |
| Total                     | 20 $\mu$ l                |
|                           |                           |
| Samples evaluated         | Results                   |
| Lane 1 (molecular marker) | Promega DNA Ladder 100bp  |
| Lane 2 ( sample PE59 )    | Repeat sample             |
| Lane 3 ( sample DA16)     | Repeat sample             |
| Lane 4 (PO23)             | Genotype 1                |
| Lane 5 (PO24)             | Genotype 1                |

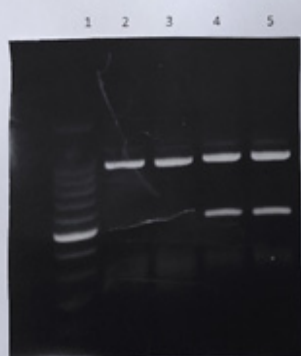

# Analysis of the MSP-3 α *Plasmodium vivax* Gene

## Restriction Enzyme Reactions= HhaI

| Reagents used             | Quantities for a reaction |
|---------------------------|---------------------------|
| Buffer 10x                | 2 µl                      |
| BSA 10 µg/ µl             | 0.2 µl                    |
| Enzyme HhaI               | 0.5 µl                    |
| DNA amplified product     | 5 µl                      |
| Nuclease-free water       | 12.3 µl                   |
| <b>Total</b>              | <b>20 µl</b>              |
|                           |                           |
| Samples evaluated         | Results                   |
| Lane 1 (molecular marker) | Promega DNA Ladder 100bp  |
| Lane 2 (sample DAS4)      | Genotype 2                |
| Lane 3 (sample PO61)      | Genotype 2                |
| Lane 4 (sample PO62)      | Genotype 2                |
| Lane 5 (sample POS0)      | Genotype 2                |
| Lane 6 (sample PO40)      | Genotype 2                |
| Lane 7 (sample PO07)      | Genotype 2                |
| Lane 8 (sample KY165)     | Genotype 2                |
| Lane 9 (sample KY166)     | Genotype 2                |
| Lane 10 (sample KY159)    | Genotype 2                |
| Lane 11 (sample KY161)    | Genotype 2                |
| Lane 12 (sample KY151)    | Genotype 2                |
| Lane 13 (sample DAS2)     | Genotype 2                |
| Lane 14 (sample DAS4)     | Genotype 2                |

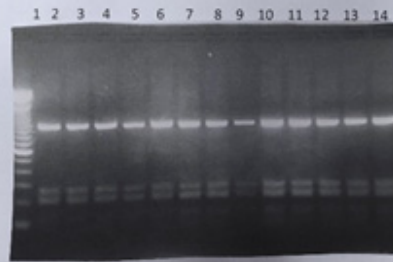

# Analysis of the MSP-3 a *Plasmodium vivax* Gene

Restriction Enzyme Reactions= HhaI

| Reagents used             | Quantities for a reaction |
|---------------------------|---------------------------|
| Buffer 10x                | 2 µl                      |
| BSA 10 µg/ µl             | 0.2 µl                    |
| Enzyme HhaI               | 0.5 µl                    |
| DNA amplified product     | 5 µl                      |
| Nuclease-free water       | 12.3 µl                   |
| Total                     | 20 µl                     |
|                           |                           |
| Samples evaluated         | Results                   |
| Lane 1 (sample VE08)      | repeat sample             |
| Lane 2 (sample VE09)      | repeat sample             |
| Lane 3 (sample VE10)      | repeat sample             |
| Lane 4 (sample VE11)      | Genotype 1                |
| Lane 5 (sample VE12)      | repeat sample             |
| Lane 6 (molecular marker) | Promega DNA Ladder 100bp  |

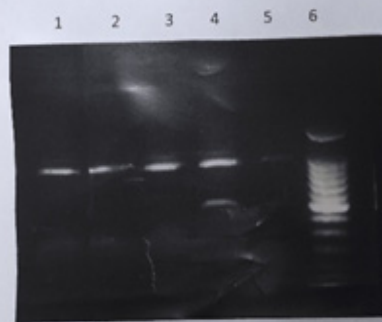

# Analysis of the MSP-3 $\alpha$ *Plasmodium vivax* Gene

## Restriction Enzyme Reactions= HhaI

| Reagents used             | Quantities for a reaction   |
|---------------------------|-----------------------------|
| Buffer 10x                | 2 $\mu$ l                   |
| BSA 10 $\mu$ g/ $\mu$ l   | 0.2 $\mu$ l                 |
| Enzyme HhaI               | 0.5 $\mu$ l                 |
| DNA amplified product     | 5 $\mu$ l                   |
| Nuclease-free water       | 12.3 $\mu$ l                |
| <b>Total</b>              | <b>20 <math>\mu</math>l</b> |
|                           |                             |
| Samples evaluated         | Results                     |
| Lane 1 (molecular marker) | Promega DNA Ladder 100bp    |
| Lane 2 (sample DA01)      | Genotype 2                  |
| Lane 3 (sample DA06)      | Genotype 2                  |
| Lane 4 (sample DA08)      | Genotype 2                  |
| Lane 5 (sample DA09)      | Genotype 2                  |
| Lane 6 (sample DA10)      | Genotype 2                  |
| Lane 7 (sample DA16)      | Genotype 2                  |
| Lane 8 (sample DA18)      | Genotype 2                  |
| Lane 9 (sample DA19)      | Genotype 2                  |
| Lane 10 (sample DA31)     | Genotype 2                  |

1 2 3 4 5 6 7 8 9 10

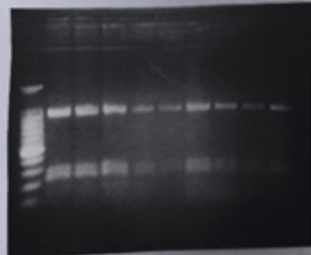

# Analysis of the MSP-3 α *Plasmodium vivax* Gene

## Restriction Enzyme Reactions= HhaI

| Reagents used             | Quantities for a reaction |
|---------------------------|---------------------------|
| Buffer 10x                | 2 µl                      |
| BSA 10 µg/ µl             | 0.2 µl                    |
| Enzyme HhaI               | 0.5 µl                    |
| DNA amplified product     | 5 µl                      |
| Nuclease-free water       | 12.3 µl                   |
| Total                     | 20 µl                     |
|                           |                           |
| Samples evaluated         | Results                   |
| Lane 1 (sample DA15)      | Genotype 1                |
| Lane 2 (sample DA17)      | Genotype 1                |
| Lane 3 (sample VE10)      | Genotype 1                |
| Lane 4 (sample VE12)      | repeat sample             |
| Lane 5 (sample VE14)      | repeat sample             |
| Lane 6 (molecular marker) | Promega DNA Ladder 100bp  |

1 2 3 4 5 6

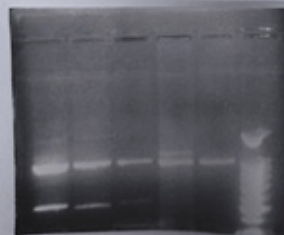

Supplement: s1 [file s1]
