# Supplementary material for: Plasmodium vivax Genetic Diversity in Panama: Challenges for Malaria Elimination in Mesoamerica
Source: MDPI journal article supplement (doi:10.3390/pathogens10080989), 2021-08-05
Supplement: s1 [file s1]

a.

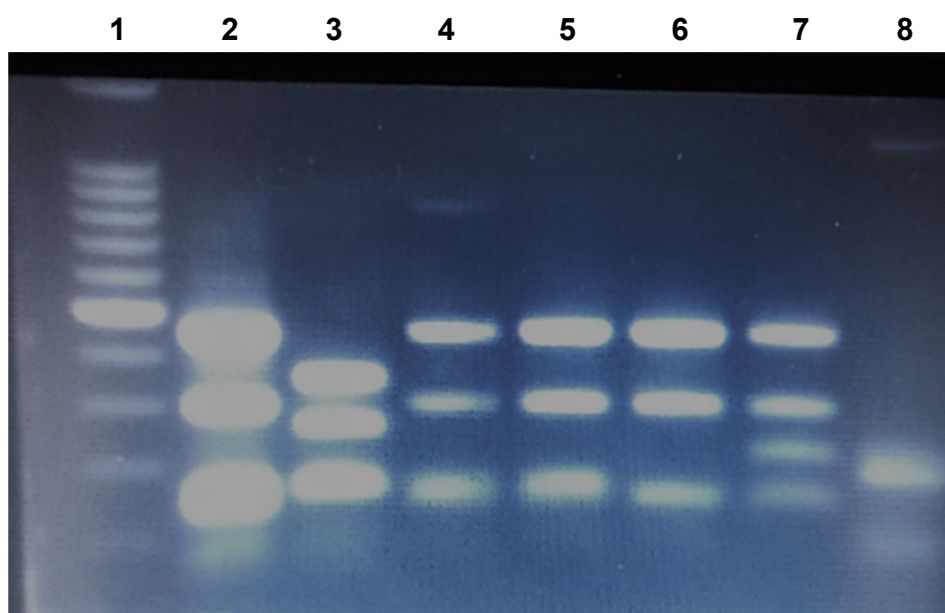

b.

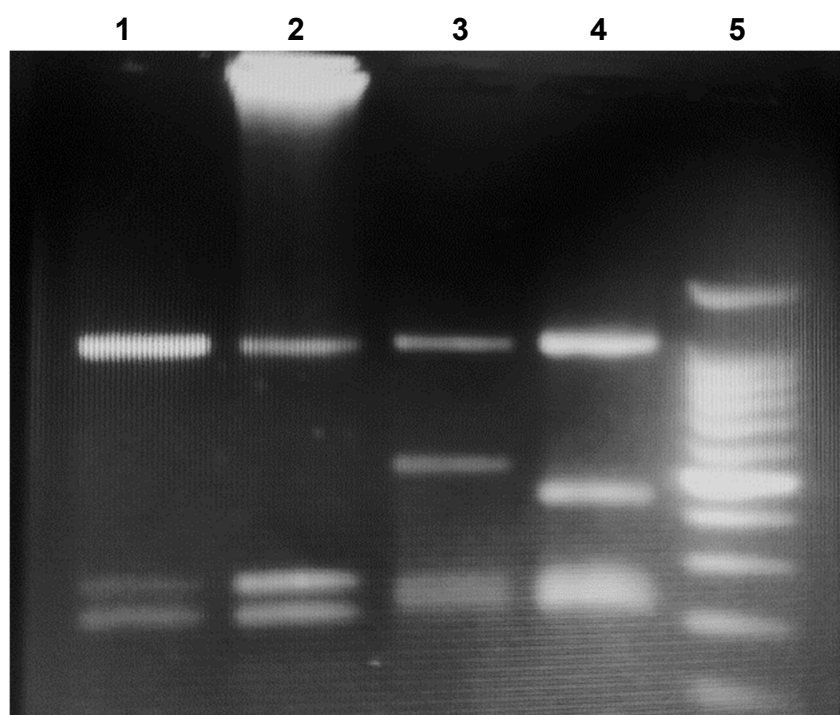

c.

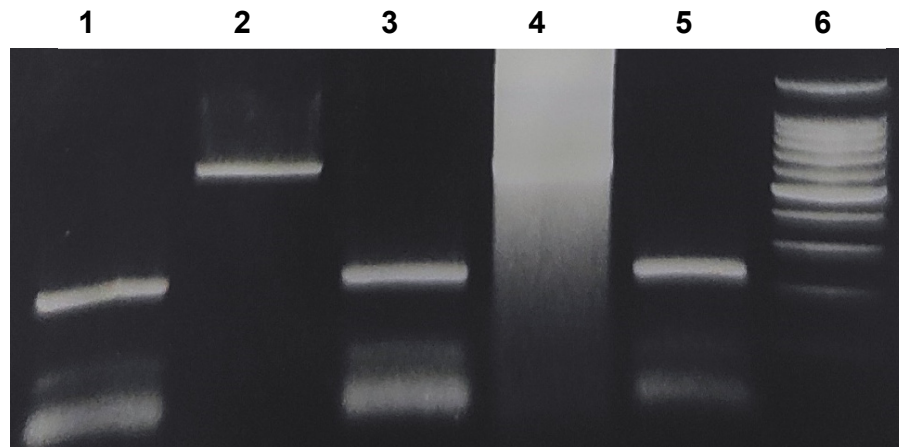

a. Representative agarose gel for *Plasmodium vivax* *msp-1* gene products digested with *Alu* I. Lane 1: Molecular weight marker 100-bp ladder; Lanes 2, 4, 5 and 6: Genotype I; Lane 3: Genotype II; Lane 7: Genotype III; Lane 8: Genotype IV.

b. Representative agarose gel for *Plasmodium vivax* *msp-3α* gene products digested with *Hha* I. Lanes 1 and 2: Genotype II; Lane 3: Genotype I; Lane 4: Genotype III; Lane 5: Molecular weight marker 100-bp ladder.

c. Representative agarose gel for *Plasmodium vivax* *csp* gene products digested with *Bst*NI. Lanes: 1, 3, and 5: vk210 variant; Lanes 2 and 4: Undigested amplification products; Lane 5: Molecular weight marker 100-bp ladder.
